# Supplementary material for: Integrative HPLC profiling and transcriptome analysis revealed insights into anthocyanin accumulation and key genes at three developmental stages of black rice (Oryza sativa. L) caryopsis
Source: Frontiers journal article supplement (doi:10.3389/fpls.2023.1211326), 2023-08-30
Supplement: Data_Sheet_2.ZIP [file Data_Sheet_2.ZIP]

## Sheet: Suppl
Supplemental table 12. Expression analysis of all putative anthocyanin biosynthesis genes at different period
Gene_id	Gene name	Gene description	Milk	Dough	Mature	FC(Dough /Milk)	Log2FC(Dough/Milk)	Pvalue	Padjust	Regulate	FC(Mature/Dough)	Log2FC(Mature/Dough)	Pvalue	Padjust	Mature	FC(Mature/Milk)	Log2FC(Mature/Milk)	Pvalue	Padjust	Regulate
MSTRG.13983		-	0.22	2.68	0.94	10.932	3.45053	0.00143167	0.00833995	up	0.265	-1.91717	0.0202237	0.128921	0.94	-	-	-	-	-
MSTRG.19976		-	0.75	3.86	0.865	5.05	2.33616	0.0010087	0.00625714	up	0.173	-2.52841	0.000167573	0.00334066	0.865	-	-	-	-	-
Os01g0370200	OsGSTF7	Similar to Glutathione-S-transferase 19E50	-	0.34	0	-	-	-	-	-	0.023	-5.47093	0.0433542	1	0	-	-	-	-	-
Os01g0370750		Non-protein coding transcript	-	0.85	0.12	-	-	-	-	-	0.126	-2.98616	0.0190383	0.123883	0.12	-	-	-	-	-
Os01g0372500	ANS	Similar to Leucoanthocyanidin dioxygenase (EC 1.14.11.19) (LDOX) (Leucocyanidin oxygenase) (Leucoanthocyanidin hydroxylase)	51.45	190.35	4.965	-	-	-	-	-	0.02	-5.60996	1.37272e-68	3.4513e-64	4.965	0.068	-3.88055	0.000457371	0.00239333	down
Os01g0127450		Similar to MYBL2 (ARABIDOPSIS MYB-LIKE 2); DNA binding / transcription factor	0.725	4.46	-	5.347	2.41869	0.0497417	0.129068	up	-	-	-	-	-	-	-	-	-	-
Os01g0177100	OsWD40-4	Similar to STYLOSA protein	0.03	0.56	-	17.377	4.11907	0.00252523	0.0130476	up	-	-	-	-	-	-	-	-	-	-
Os01g0191900	R2R3-MYB	Similar to Blind	1.285	7.165	-	4.855	2.27941	0.0364331	0.102419	up	-	-	-	-	-	-	-	-	-	-
Os01g0353400	OsGSTF11	Similar to Glutathione S-transferase GST 8 (EC 2.5.1.18)	0.045	1.2	-	23.612	4.56142	0.0277457	0.0835105	up	-	-	-	-	-	-	-	-	-	-
Os01g0369800		Hypothetical protein	0.04	3.855	-	88.847	6.47325	0.0383949	0.106405	up	-	-	-	-	-	-	-	-	-	-
Os01g0383700	OsWD40-14	Similar to LEC14B protein	1.63	14.08	18.37	7.598	2.92567	0.00168299	0.00946125	up	-	-	-	-	-	7.692	2.94343	0.00358258	0.0130556	up
Os01g0607600	OsWD40-18	WD40 repeat domain containing protein	1.925	1.625	0.76	-	-	-	-	-	0.367	-1.44688	0.00310971	0.0327132	0.76	0.302	-1.72932	0.00398156	0.0142059	down
Os01g0633500	Rd	Dihydroflavonol-4-reductase (DFR), Proanthocyanidin synthesi	-	512.565	129.575	-	-	-	-	-	0.187	-2.41929	0.0279048	0.159741	129.575
Os01g0685400		Homeodomain-like domain containing protein	4.24	16.71	7.825	4.064	2.02275	0.0420415	0.11385	up	0.348	-1.52315	0.00326174	0.033873	7.825	-	-	-	-	-
Os01g0709000		Similar to Transcription factor MYB1	-	0.555	0.03	-	-	-	-	-	0.045	-4.46072	0.00844012	0.0693922	0.03	-	-	-	-	-
Os01g0975300	OsMYB48	MYB-related transcription factor, Drought and salinity toleranc	-	4.635	1.645	-	-	-	-	-	0.313	-1.67771	4.47376e-05	0.00115958	1.645	-	-	-	-	-
Os01g0734800	OsUGT706F1	UDP-glucuronosyl/UDP-glucosyltransferase family protein	0.155	6.9	6.805	41.461	5.37368	0.0116124	0.0431336	up	-	-	-	-	-	32.184	5.00827	2.48595e-05	0.000199127	up
Os01g0736100	OsUGT706C1	UDP-glucuronosyl/UDP-glucosyltransferase family protein	0.2	1.095	-	5.316	2.41047	0.0291158	0.0866439	up	-	-	-	-	-	-	-	-	-	-
Os02g0466900		Hypothetical protein	-	-	-	-	-	-	-	-	-	-	-	-	-	-	-	-	-	-
Os02g0467600	C4H1	Similar to Cinnamate 4-hydroxylase CYP73	2.05	13.885	5.855	6.012	2.58774	0.0108692	0.0409576	up	0.334	-1.58415	1.04803e-05	0.000351797	5.855	-	-	-	-	-
Os02g0626100	OsPAL	Similar to Phenylalanine ammonia-lyase	93.74	370.23	172.44	4.449	2.15362	0.00510006	0.0226175	up	0.446	-1.16387	1.72952e-05	0.000532888	172.44	-	-	-	-	-
Os02g0626400	OsPAL	Phenylalanine ammonia-lyase (EC 4.3.1.5)	-	440.925	285.375	-	-	-	-	-	0.499	-1.00228	0.014667	0.102833	285.375
Os02g0663300	OsWD40-48	BEACH domain domain containing protein	0.25	0.78	0.645	11.782	3.5585	0.000672594	0.00450903	up	-	-	-	-	-	8.669	3.11591	0.00860379	0.026654	up
Os02g0682500	OsWD40-50	Similar to TRANSPARENT TESTA GLABRA 1 protein (TTG1 protein)	5.79	34.625	13.42	4.435	2.14905	0.00215019	0.0115084	up	0.296	-1.75552	0.00076179	0.0112005	13.42	-	-	-	-	-
Os02g0804933		Non-protein coding transcript	0	0.255	-	79.913	6.32036	0.00307123	0.015183	up	-	-	-	-	-	-	-	-	-	-
Os03g0367101	OsCYP75A11	Similar to cytochrome P450 flavonoid 3',5'-hydroxylase	1.735	7.565	2.44	3.944	1.97984	0.0214458	0.0687895	up	0.242	-2.04439	0.00358109	0.0363928	2.44	-	-	-	-	-
Os03g0412800	OsG6PDH4	Similar to Glucose-6-phosphate dehydrogenase precursor	-	0.93	0.065	-	-	-	-	-	0.056	-4.16425	0.00174895	0.0210695	0.065	-	-	-	-	-
Os03g0819600	gh1	Chalcone isomerase (EC 5.5.1.6)	-	128.435	72.955	-	-	-	-	-	0.441	-1.18194	0.00120081	0.015749	72.955	-	-	-	-	-
Os03g0410000	OsMyb3	Conserved hypothetical protein	1.37	6.425	-	4.179	2.06318	0.0446336	0.118953	up	-	-	-	-	-	-	-	-	-	-
Os04g0373400		Similar to MATE efflux family protein, expressed	0.625	3.29	-	5.323	2.41234	0.000110572	0.00103202	up	-	-	-	-	-	-	-	-	-	-
Os04g0429300	OsbHLH145	Similar to OSIGBa0093L02.4 protein	5.15	5.905	2.725	-	-	-	-	-	0.32	-1.64372	0.0002529	0.00459422	2.725	0.403	-1.31011	0.0255951	0.0638433	down
Os04g0485300	OsG6PDH2	Glucose-6-phosphate dehydrogenase	-	185.14	72.095	-	-	-	-	-	0.292	-1.77496	0.000118473	0.00253501	72.095	-	-	-	-	-
Os04g0459000	MDR13	Multidrug-resistance(MDR)-like ATP Binding Cassette B (ABCB) transporter, P-glyco-protein, Auxin transport, Iron homeostasi	0.055	1.085	0.785	17.79	4.15302	6.5282e-05	0.000663784	up	-	-	-	-	-	11.856	3.56758	0.00384959	0.0138029	up
Os04g0557200	OsbHLH015	Similar to Anthocyanin regulatory B protein (Fragment)	0.05	3.855	5.495	74.523	6.21961	4.96102e-12	3.53816e-10	up	-	-	-	-	-	91.156	6.51027	4.73535e-08	7.91823e-07	up
Os04g0662600	OsF3H-1	Similar to Naringenin,2-oxoglutarate 3-dioxygenase	-	318.11	86.33	-	-	-	-	-	0.213	-2.22842	0.000190894	0.00367493	86.33
Os05g0320700	C4H2	Similar to Cytochrome P450	8.765	92.55	67.6	9.577	3.25952	5.18588e-05	0.000549655	up	-	-	-	-	-	5.448	2.44585	0.00441113	0.0154734	up
Os05g0427400	OsPAL04	Similar to Phenylalanine ammonia-lyase	-	10.775	3.625	-	-	-	-	-	0.255	-1.97018	0.00234039	0.0265055	3.625
Os05g0553400	OsMYB55	Similar to Myb-related transcription factor-like protein (MYB transcription factor)	0.02	0.795	0.775	35.654	5.15598	0.0070052	0.0290077	up	-	-	-	-	-	27.387	4.77543	0.0309855	0.0743044	up
Os06g0111550		Hypothetical protein	0	-	0.675	-	-	-	-	-	-	-	-	-	-	84.124	6.39444	0.040596	0.092272	up
Os06g0165800	ROMT-16	Similar to Caffeoyl-CoA 3-O-methyltransferase (Fragment)	2.505	14.01	11.54	5.248	2.39175	1.11458e-06	2.11737e-05	up	-	-	-	-	-	3.384	1.75882	0.0165938	0.045225	up
Os06g0192001		Hypothetical protein	1	13.65	3.715	12.107	3.59776	0.00292366	0.0146195	up	0.21	-2.25351	0.00995943	0.0781767	3.715	-	-	-	-	-
Os06g0192100	UGT	-	-	34.29	4.77	-	-	-	-	-	0.107	-3.22657	4.76013e-13	1.75999e-10	4.77	-	-	-	-	-
Os06g0644600	OsWD40-131	Similar to predicted protein	0.635	2.07	2.875	3.151	1.65564	0.00104783	0.00644135	up	-	-	-	-	-	3.637	1.86274	0.00426562	0.0150482	up
Os07g0510400		UDP-glucuronosyl/UDP-glucosyltransferase family protein	-	3.37	0.82	-	-	-	-	-	0.181	-2.46709	0.000223315	0.00416512	0.82	-	-	-	-	-
Os08g0562800		Similar to Transparent testa 12 protein	-	40.94	14.815	-	-	-	-	-	0.269	-1.89213	0.00312534	0.0328363	14.815	-	-	-	-	-
Os08g0549000	OsGL1A	R2R3 MYB transcription factor, Homologue of Arabidopsis transcription factor GL	1.68	17.595	12.4	9.597	3.26259	2.26788e-06	3.91904e-05	up	-	-	-	-	-	5.344	2.41796	0.0018143	0.00748516	up
Os10g0317900	CYP75B4	Chrysoeriol 5'-Hydroxylase, Flavonoid B-ring hydroxylase, Tricin biosynthesi	-	18.455	7.885	-	-	-	-	-	0.283	-1.81952	0.0118218	0.0885382	7.885
Os10g0317950		Hypothetical protein	0	1.905	-	74.993	6.22869	0.00872557	0.0344852	up	-	-	-	-	-	-	-	-	-	-
Os10g0320100	OsF3'H	Similar to Flavonoid 3'-monooxygenase (EC 1.14.13.21) (Flavonoid 3'-hydroxylase) (Cytochrome P450 75B2)	-	174.21	54.875	-	-	-	-	-	0.236	-2.08375	0.000550491	0.00868829	54.875
Os10g0320201		Hypothetical protein	-	33.08	14.005	-	-	-	-	-	0.327	-1.61046	0.00894989	0.0721355	14.005
Os10g0344000		Similar to transparent testa 12 protein	0	0.21	-	38.572	5.26949	0.048671	0.126942	up	-	-	-	-	-	-	-	-	-	-
Os10g0344900		Multi antimicrobial extrusion protein MatE family protein	0.03	0.555	-	19.252	4.26691	0.00949761	0.0369243	up	-	-	-	-	-	-	-	-	-	-
Os10g0395400	OsGSTU34	Thioredoxin fold domain containing protein	-	470.11	47.835	-	-	-	-	-	0.078	-3.67981	1.17198e-18	1.4733e-15	47.835
Os10g0530800		Hypothetical protein	0	0.5	-	74.342	6.21611	0.00731808	0.030052	up	-	-	-	-	-	-	-	-	-	-
Os11g0116300	CHI	Chalcone isomerase domain containing protein	-	81.905	18.755	-	-	-	-	-	0.17	-2.55254	4.11597e-06	0.000161441	18.755	-	-	-	-	-
Os11g0126100		Multi antimicrobial extrusion protein MatE family protein	-	0.6	0.17	-	-	-	-	-	0.232	-2.1068	0.045466	0.219947	0.17	-	-	-	-	-
Os11g0129000		Similar to Transparent testa 12 protein	-	1.455	0	-	-	-	-	-	0.003	-8.41939	4.74463e-07	2.60458e-05	0	-	-	-	-	-
Os11g0212900	OsWD40-187	Serine/threonine protein kinase-related domain containing protein	0	0.76	1.115	183.946	7.52314	2.59363e-05	0.000310486	up	-	-	-	-	-	205.036	7.67973	0.000136558	0.000849329	up
Os11g0530600	CHS*	Similar to Chalcone synthase C2 (EC 2.3.1.74) (Naringenin-chalcone synthase C2)	-	808.45	135.875	-	-	-	-	-	0.126	-2.98984	2.01467e-07	1.29216e-05	135.875	-	-	-	-	-
Os11g0530650		Hypothetical protein	0.29	2.865	0.27	9.139	3.19199	0.0295026	0.0875164	up	0.069	-3.85746	0.00142099	0.017935	0.27	-	-	-	-	-
Os12g0115700	CHI	Chalcone isomerase domain containing protein	-	45.84	9.8	-	-	-	-	-	0.161	-2.63674	6.01418e-06	0.00021978	9.8	-	-	-	-	-
Os12g0175400	R2R3-MYB	Similar to OSMYB2	-	10.775	2.68	-	-	-	-	-	0.178	-2.49305	5.91096e-05	0.00146562	2.68	-	-	-	-	-
Os12g0599550	OsbHLH116	Similar to Helix-loop-helix DNA-binding domain containing protein	0.17	2.675	2.125	35.556	5.15201	5.37513e-08	1.54211e-06	up	-	-	-	-	-	24.023	4.58637	3.21471e-05	0.000247156	up
